# Supplementary material
Source: publisher figshare collection journal article supplement (https://tandf.figshare.com/articles/dataset/_/5530285)
Supplement: Supplementary file 1 [file 2]

Supplementary Material for  
“Two-Step Estimation of Incomplete Information Social Interaction Models with Sample Selection”

Tadao Hoshino  
School of Management, Tokyo University of Science  
E-mail: thoshino@rs.tus.ac.jp

(Not for publication)

## 1 Proofs of Lemmas

**Proof of Lemma A.1.** (i) By the mean value expansion,

$$\begin{aligned}\left\|\hat{P}_n^{L'} D_n / \sqrt{n} - P_n^{L'} D_n / \sqrt{n}\right\| &= \left\|\dot{P}_n^L (\bar{V}_n)' \text{diag} [W_n (\hat{\gamma}_n - \gamma_0)] D_n / \sqrt{n}\right\| \\ &= O_P(1) \cdot \left\|\dot{P}_n^L (\bar{V}_n)' D_n / n\right\| \\ &= O_P(\zeta_1(L) / \sqrt{n}) = o_P(1)\end{aligned}$$

as  $n \rightarrow \infty$  by Assumptions 2.2 and 5.2, where  $\dot{P}_n^L (\bar{V}_n) = (\partial_v p^L(\bar{v}_1), \dots, \partial_v p^L(\bar{v}_n))'$  with  $\bar{V}_n = (\bar{v}_1, \dots, \bar{v}_n)'$ , and  $\bar{v}_i \in [\hat{v}_i, v_i]$  for each  $i = 1, \dots, n$ .

(ii) We obtain, by the independence,

$$\begin{aligned}\mathbb{E} \left\| P_n^{L'} D_n P_n^L / n - P_n^{L'} \bar{D}_n P_n^L / n \right\|^2 &= \mathbb{E} \left\| n^{-1} \sum_{i=1}^n p^L(v_i) p^L(v_i)' (d_i - \mathbb{E}[d_i]) \right\|^2 \\ &= n^{-2} \sum_{k=1}^L \sum_{j=1}^L \mathbb{E} \left( \sum_{i=1}^n p_j(v_i) p_k(v_i) (d_i - \mathbb{E}[d_i]) \right)^2 \\ &= n^{-2} \sum_{k=1}^L \sum_{j=1}^L \sum_{i=1}^n \sum_{\ell=1}^n p_j(v_i) p_k(v_i) p_j(v_\ell) p_k(v_\ell) \mathbb{E}[(d_i - \mathbb{E}[d_i]) (d_\ell - \mathbb{E}[d_\ell])] \\ &= n^{-2} \sum_{k=1}^L \sum_{j=1}^L \sum_{i=1}^n p_j^2(v_i) p_k^2(v_i) \mathbb{E}[d_i] (1 - \mathbb{E}[d_i]) \\ &\leq n^{-2} \sum_{k=1}^L \sum_{j=1}^L \sum_{i=1}^n p_j^2(v_i) p_k^2(v_i) \\ &= O(\zeta_0^2(L) L / n) = o(1).\end{aligned}$$

Therefore, the result follows from Markov's inequality with Assumption 5.2.

(iii) Using the same argument as in the proof of Lemma A.1 in Su and Jin (2012), we obtain

$$\begin{aligned}\tau_{\max} \left( P_n^{L'} D_n P_n^L / n \right) &= \max_{\|\mathcal{X}\|=1} \left\{ \mathcal{X}' \left( P_n^{L'} \bar{D}_n P_n^L / n \right) \mathcal{X} + \mathcal{X}' \left( P_n^{L'} D_n P_n^L / n - P_n^{L'} \bar{D}_n P_n^L / n \right) \mathcal{X} \right\} \\ &\leq \tau_{\max} \left( P_n^{L'} \bar{D}_n P_n^L / n \right) + \left\| P_n^{L'} D_n P_n^L / n - P_n^{L'} \bar{D}_n P_n^L / n \right\| \\ &\leq \bar{c}_P + o_P(1)\end{aligned}$$

and

$$\begin{aligned}\tau_{\min} \left( P_n^{L'} D_n P_n^L / n \right) &= \min_{\|\mathcal{X}\|=1} \left\{ \mathcal{X}' \left( P_n^{L'} \bar{D}_n P_n^L / n \right) \mathcal{X} + \mathcal{X}' \left( P_n^{L'} D_n P_n^L / n - P_n^{L'} \bar{D}_n P_n^L / n \right) \mathcal{X} \right\} \\ &\geq \tau_{\min} \left( P_n^{L'} \bar{D}_n P_n^L / n \right) - \left\| P_n^{L'} D_n P_n^L / n - P_n^{L'} \bar{D}_n P_n^L / n \right\| \\ &\geq \underline{c}_P - o_P(1)\end{aligned}$$

for sufficiently large  $n$  by Assumption 6 and the result (ii).

(iv) By the triangle inequality,

$$\begin{aligned} \left\| \widehat{P}_n^{L'} D_n \widehat{P}_n^L / n - P_n^{L'} D_n P_n^L / n \right\| &\leq \left\| \widehat{P}_n^{L'} D_n / \sqrt{n} - P_n^{L'} D_n / \sqrt{n} \right\|^2 + 2 \left\| \left[ \widehat{P}_n^{L'} D_n - P_n^{L'} D_n \right] P_n^L / n \right\| \\ &\leq 2 \left\| \left[ \widehat{P}_n^{L'} D_n - P_n^{L'} D_n \right] P_n^L / n \right\| + O_P(\zeta_1^2(L)/n) \end{aligned}$$

by the result (i). Furthermore, by Assumption 6.2 and (i),

$$\begin{aligned} &\left\| \left[ \widehat{P}_n^{L'} D_n - P_n^{L'} D_n \right] P_n^L / n \right\|^2 \\ &= \text{tr} \left\{ \left[ \widehat{P}_n^{L'} D_n / \sqrt{n} - P_n^{L'} D_n / \sqrt{n} \right] \left( P_n^L P_n^{L'} / n \right) \left[ \widehat{P}_n^{L'} D_n / \sqrt{n} - P_n^{L'} D_n / \sqrt{n} \right]' \right\} \\ &\leq \bar{c}_P \left\| \widehat{P}_n^{L'} D_n / \sqrt{n} - P_n^{L'} D_n / \sqrt{n} \right\|^2 = O_P(\zeta_1^2(L)/n) \end{aligned}$$

as  $n \rightarrow \infty$ . This implies (iv).

The proof of (v) is similar to that of (iii) with the use of (iv), and is omitted.

(vi) Denote the  $i$ th element of  $H_n(\theta)$  as  $h_i(\theta)$ . Because matrix  $S_n(\lambda)$  is uniformly bounded in absolute value in row sums for any  $\lambda \in \mathcal{L} \subset (-1, 1)$  (see, e.g., Lemma A.2 in Lee, 2004), the  $h_i(\theta)$ 's are also uniformly bounded in absolute value for any  $\theta \in \mathcal{L} \times \mathcal{B}$ . Then, we obtain

$$\sup_{\theta \in \mathcal{L} \times \mathcal{B}} \|D_n U_n(\theta) / \sqrt{n}\| \leq \sup_{\theta \in \mathcal{L} \times \mathcal{B}} \|D_n H_n(\theta) / \sqrt{n}\| + \|D_n \mathcal{E}_n / \sqrt{n}\| = O_P(1). \quad (1.1)$$

Hence,

$$\sup_{\theta \in \mathcal{L} \times \mathcal{B}} \left\| \left( P_n^{L'} D_n - \widehat{P}_n^{L'} D_n \right) U_n(\theta) / n \right\| \leq \left\| \widehat{P}_n^{L'} D_n / \sqrt{n} - P_n^{L'} D_n / \sqrt{n} \right\| \cdot \sup_{\theta \in \mathcal{L} \times \mathcal{B}} \|D_n U_n(\theta) / \sqrt{n}\| = o_P(1)$$

by (i).

(vii) Noting that the eigenvalues of an idempotent matrix are at most one, for sufficiently large  $n$ ,

$$\begin{aligned} \sup_{\theta \in \mathcal{L} \times \mathcal{B}} \|U_n(\theta)' \mathcal{A}_n\| &= \sup_{\theta \in \mathcal{L} \times \mathcal{B}} \left\{ U_n(\theta)' D_n P_n^L \left[ P_n^{L'} D_n P_n^L \right]^{-2} P_n^{L'} D_n U_n(\theta) \right\}^{1/2} \\ &\leq [\bar{c}_d \bar{c}_P - o_P(1)]^{-1/2} \sup_{\theta \in \mathcal{L} \times \mathcal{B}} \|D_n U_n(\theta) / \sqrt{n}\| = O_P(1) \end{aligned}$$

by (iii) and (1.1). The proof of (viii) is similar to that of (vii) with the use of (v) and (1.1), and is omitted. ■

**Proof of Lemma A.2.** Write

$$Q_n(\theta) - Q_n^*(\theta) = Q_n(\theta) - Q_{n,1}(\theta) + Q_{n,1}(\theta) - Q_n^*(\theta),$$

where

$$Q_{n,1}(\theta) = \frac{1}{2n} U_n(\theta)' D_n [I_n - \mathcal{P}_n] D_n U_n(\theta).$$

First, observe that

$$\begin{aligned} |Q_n(\theta) - Q_{n,1}(\theta)| &= \left| U_n(\theta)' \mathcal{P}_n U_n(\theta) / (2n) - U_n(\theta)' \widehat{\mathcal{P}}_n U_n(\theta) / (2n) \right| \\ &= \left| U_n(\theta)' \mathcal{A}_n P_n^{L'} D_n U_n(\theta) / (2n) - U_n(\theta)' \widehat{\mathcal{A}}_n \widehat{P}_n^{L'} D_n U_n(\theta) / (2n) \right| \\ &\leq \left| U_n(\theta)' \mathcal{A}_n \left( \widehat{P}_n^{L'} D_n \widehat{P}_n^L - P_n^{L'} D_n P_n^L \right) \widehat{\mathcal{A}}_n' U_n(\theta) / (2n) \right| \\ &\quad + \left| U_n(\theta)' \mathcal{A}_n \left( P_n^{L'} D_n - \widehat{P}_n^{L'} D_n \right) U_n(\theta) / (2n) \right| + \left| U_n(\theta)' \widehat{\mathcal{A}}_n \left( \widehat{P}_n^{L'} D_n - P_n^{L'} D_n \right) U_n(\theta) / (2n) \right| \\ &\leq \|U_n(\theta)' \mathcal{A}_n\| \left\| \widehat{P}_n^{L'} D_n \widehat{P}_n^L / n - P_n^{L'} D_n P_n^L / n \right\| \|\widehat{\mathcal{A}}_n' U_n(\theta)\| \\ &\quad + \left( \|U_n(\theta)' \mathcal{A}_n\| + \|U_n(\theta)' \widehat{\mathcal{A}}_n\| \right) \left\| \left( P_n^{L'} D_n - \widehat{P}_n^{L'} D_n \right) U_n(\theta) / n \right\| = o_P(1) \end{aligned} \quad (1.2)$$

uniformly in  $\theta \in \mathcal{L} \times \mathcal{B}$  by Lemma A.1 (iv), (vi), (vii), and (viii).

Next, let

$$\begin{aligned}\delta_{n1}(\theta) &\equiv \frac{1}{n} [U_n(\theta)' D_n U_n(\theta) - E(U_n(\theta)' D_n U_n(\theta))] \\ \delta_{n2}(\theta) &\equiv \frac{1}{n} \left[ U_n(\theta)' P_n U_n(\theta) - E \left( U_n(\theta)' D_n P_n^L \right) \left( P_n^{L'} \overline{D}_n P_n^L \right)^{-1} E \left( P_n^{L'} D_n U_n(\theta) \right) \right]\end{aligned}$$

so that

$$Q_{n,1}(\theta) - Q_n^*(\theta) = \frac{1}{2} \delta_{n1}(\theta) - \frac{1}{2} \delta_{n2}(\theta).$$

Below, we show that  $\delta_{n1}(\theta) = o_P(1)$  uniformly in  $\theta \in \mathcal{L} \times \mathcal{B}$ :

$$\begin{aligned}\delta_{n1}(\theta) &= H_n(\theta)' \{D_n - E[D_n]\} H_n(\theta) / n + 2H_n(\theta)' \{D_n \mathcal{E}_n - E[D_n \mathcal{E}_n]\} / n + (\mathcal{E}_n' D_n \mathcal{E}_n / n - E[\mathcal{E}_n' D_n \mathcal{E}_n / n]) \\ &= n^{-1} \sum_{i=1}^n h_i^2(\theta) (d_i - E[d_i]) + 2n^{-1} \sum_{i=1}^n h_i(\theta) (d_i \varepsilon_i - E[d_i \varepsilon_i]) + (\mathcal{E}_n' D_n \mathcal{E}_n / n - E[\mathcal{E}_n' D_n \mathcal{E}_n / n]) \\ &= T_{n1}(\theta) + T_{n2}(\theta) + T_{n3}, \text{ say.}\end{aligned}$$

Recalling that  $h_i(\theta)$ 's are uniformly bounded in absolute value for any  $\theta \in \mathcal{L} \times \mathcal{B}$ , it is straightforward to see  $T_{n1}(\theta) = o_P(1)$  and  $T_{n2}(\theta) = o_P(1)$  uniformly in  $\theta \in \mathcal{L} \times \mathcal{B}$ . In addition,  $T_{n3} = o_P(1)$  can be shown by Chebyshev's inequality. Specifically, observe that, by the independence,

$$\begin{aligned}E[\mathcal{E}_n' D_n \mathcal{E}_n] &= E \left[ \sum_{i=1}^n d_i \varepsilon_i^2 \right] = \sum_{i=1}^n E[d_i] \sigma_i^2 \\ E[(\mathcal{E}_n' D_n \mathcal{E}_n)^2] &= E \left[ \sum_{i=1}^n d_i \varepsilon_i^4 + \sum_{i=1}^n \sum_{j \neq i}^n d_i \varepsilon_i^2 d_j \varepsilon_j^2 \right] \\ &= \text{tr}(E[D_n] \Sigma_{n,4}) + \sum_{i=1}^n \sum_{j \neq i}^n E[d_i] E[d_j] \sigma_i^2 \sigma_j^2,\end{aligned}$$

where  $\Sigma_{n,4} = \text{diag}(E[\varepsilon_i^4 | d_i = 1], \dots, E[\varepsilon_j^4 | d_j = 1])$ , which exists by Assumption 3.1. Therefore,

$$\begin{aligned}\text{Var}(\mathcal{E}_n' D_n \mathcal{E}_n - E[\mathcal{E}_n' D_n \mathcal{E}_n]) &= E[(\mathcal{E}_n' D_n \mathcal{E}_n)^2] - (E[\mathcal{E}_n' D_n \mathcal{E}_n])^2 \\ &= \text{tr}(E[D_n] \Sigma_{n,4}) + \sum_{i=1}^n \sum_{j \neq i}^n E[d_i] E[d_j] \sigma_i^2 \sigma_j^2 - \sum_{i=1}^n \sum_{j=1}^n E[d_i] E[d_j] \sigma_i^2 \sigma_j^2 \\ &= \text{tr}(E[D_n] \Sigma_{n,4} - E[D_n]^2 \Sigma_n^2) = O(n),\end{aligned}$$

where  $\Sigma_n \equiv \text{diag}(\sigma_1^2, \dots, \sigma_n^2)$ . Thus, we obtain  $\text{Var}(\mathcal{E}_n' D_n \mathcal{E}_n / n - E[\mathcal{E}_n' D_n \mathcal{E}_n / n]) = o(1)$ .

Finally, we prove  $\delta_{n2}(\theta) = o_P(1)$  uniformly in  $\theta \in \mathcal{L} \times \mathcal{B}$  by showing that

$$\begin{aligned}\left\| \left( P_n^{L'} D_n P_n^L / n \right)^{-1} - \left( P_n^{L'} \overline{D}_n P_n^L / n \right)^{-1} \right\| &= o_P(1) \text{ and} \\ \left\| P_n^{L'} D_n U_n(\theta) / n - E \left( P_n^{L'} D_n U_n(\theta) / n \right) \right\| &= o_P(1) \text{ uniformly in } \theta \in \mathcal{L} \times \mathcal{B}.\end{aligned}$$

For the first part, we have already shown that  $\|P_n^{L'} D_n P_n^L / n - P_n^{L'} \overline{D}_n P_n^L / n\| = o_P(1)$  in Lemma A.1 (ii), which implies the result because

$$\begin{aligned}&\left\| \left( P_n^{L'} D_n P_n^L / n \right)^{-1} - \left( P_n^{L'} \overline{D}_n P_n^L / n \right)^{-1} \right\| \\ &= \left\| \left( P_n^{L'} D_n P_n^L / n \right)^{-1} \left( P_n^{L'} \overline{D}_n P_n^L / n - P_n^{L'} D_n P_n^L / n \right) \left( P_n^{L'} \overline{D}_n P_n^L / n \right)^{-1} \right\| \\ &\leq O_P(1) \cdot \left\| P_n^{L'} \overline{D}_n P_n^L / n - P_n^{L'} D_n P_n^L / n \right\| = o_P(1)\end{aligned} \tag{1.3}$$

by Lemma A.1 (ii) and (iii).

For the second part, by the triangle inequality,

$$\left\| P_n^{L'} D_n U_n(\theta) / n - E \left( P_n^{L'} D_n U_n(\theta) / n \right) \right\| \leq \left\| n^{-1} \sum_{i=1}^n p^L(v_i) (d_i \varepsilon_i - E[d_i \varepsilon_i]) \right\| + \left\| n^{-1} \sum_{i=1}^n p^L(v_i) h_i(\theta) (d_i - E[d_i]) \right\|.$$

Observe that, by the independence,

$$\begin{aligned} E \left\| n^{-1} \sum_{i=1}^n p^L(v_i) (d_i \varepsilon_i - E[d_i \varepsilon_i]) \right\|^2 &= n^{-2} \sum_{k=1}^L E \left( \sum_{i=1}^n p_k(v_i) (d_i \varepsilon_i - E[d_i \varepsilon_i]) \right)^2 \\ &\leq cn^{-2} \sum_{k=1}^L \sum_{i=1}^n p_k^2(v_i) = O(L/n) = o(1). \end{aligned} \quad (1.4)$$

Then, it follows that  $\|n^{-1} \sum_{i=1}^n p^L(v_i) (d_i \varepsilon_i - E[d_i \varepsilon_i])\| = o_P(1)$  by Markov's inequality. Similarly, we can show that  $\|n^{-1} \sum_{i=1}^n p^L(v_i) h_i(\theta) (d_i - E[d_i])\| = o_P(1)$  uniformly in  $\theta \in \mathcal{L} \times \mathcal{B}$  by the fact that the  $h_i(\theta)$ 's are uniformly bounded in absolute value for any  $\theta \in \mathcal{L} \times \mathcal{B}$ . ■

**Proof of Lemma A.3.** Because  $\Gamma_n' [I_n - \hat{\mathcal{P}}_n] D_n \hat{\mathcal{P}}_n^L B_{0L} = \mathbf{0}_{(k_1+k_2+2)}$  and  $I_n - \hat{\mathcal{P}}_n$  is idempotent,

$$\begin{aligned} &\left\| \Gamma_n' [I_n - \hat{\mathcal{P}}_n] D_n \Pi_0(\hat{V}_n) / \sqrt{n} \right\|^2 \\ &= \left\| \Gamma_n' [I_n - \hat{\mathcal{P}}_n] D_n (\Pi_0(\hat{V}_n) - \hat{\mathcal{P}}_n^L B_{0L}) / \sqrt{n} \right\|^2 \\ &= (\Pi_0(\hat{V}_n) - \hat{\mathcal{P}}_n^L B_{0L})' D_n [I_n - \hat{\mathcal{P}}_n] (\Gamma_n \Gamma_n' / n) [I_n - \hat{\mathcal{P}}_n] D_n (\Pi_0(\hat{V}_n) - \hat{\mathcal{P}}_n^L B_{0L}) \\ &\leq c \left\| \Pi_0(\hat{V}_n) - \hat{\mathcal{P}}_n^L B_{0L} \right\|^2 = O(nL^{-2\rho}) \end{aligned}$$

as  $n \rightarrow \infty$ . Thus,  $\left\| \Gamma_n' [I_n - \hat{\mathcal{P}}_n] D_n \Pi_0(\hat{V}_n) / \sqrt{n} \right\| = O(n^{1/2} L^{-\rho}) = o(1)$  by Assumption 5.1. ■

**Proof of Lemma A.4.** Write

$$\begin{aligned} &\Gamma_n' [I_n - \hat{\mathcal{P}}_n] D_n \tilde{\mathcal{E}}_n / \sqrt{n} - \Gamma_n^{\perp'} D_n \tilde{\mathcal{E}}_n / \sqrt{n} \\ &= \Gamma_n' [\mathcal{P}_n - \hat{\mathcal{P}}_n] D_n \tilde{\mathcal{E}}_n / \sqrt{n} + \left\{ \Gamma_n' \bar{D}_n P_n^L (P_n^{L'} \bar{D}_n P_n^L)^{-1} P_n^{L'} D_n \tilde{\mathcal{E}}_n / \sqrt{n} - \Gamma_n' \mathcal{P}_n D_n \tilde{\mathcal{E}}_n / \sqrt{n} \right\} \\ &= R_{n1} + R_{n2}, \text{ say.} \end{aligned}$$

Observe that

$$\begin{aligned} E \left[ \|R_{n1}\|^2 | D_n \right] &= n^{-1} \text{tr} \left( \Gamma_n' [\mathcal{P}_n - \hat{\mathcal{P}}_n] D_n E \left[ \tilde{\mathcal{E}}_n \tilde{\mathcal{E}}_n' | D_n \right] D_n [\mathcal{P}_n - \hat{\mathcal{P}}_n] \Gamma_n \right) \\ &\leq \bar{c}_{\varepsilon,2} n^{-1} \text{tr} \left( \Gamma_n' [\mathcal{P}_n - \hat{\mathcal{P}}_n] [\mathcal{P}_n - \hat{\mathcal{P}}_n] \Gamma_n \right). \end{aligned}$$

Using the same argument as in (1.2), we can show both  $\|n^{-1} \Gamma_n' [\mathcal{P}_n - \hat{\mathcal{P}}_n] \mathcal{P}_n \Gamma_n\|$  and  $\|n^{-1} \Gamma_n' [\mathcal{P}_n - \hat{\mathcal{P}}_n] \hat{\mathcal{P}}_n \Gamma_n\|$  are of order  $o_P(1)$ . Thus,  $n^{-1} \text{tr} \left( \Gamma_n' [\mathcal{P}_n - \hat{\mathcal{P}}_n] [\mathcal{P}_n - \hat{\mathcal{P}}_n] \Gamma_n \right) = o_P(1)$ , implying that  $\|R_{n1}\| = o_P(1)$  by Markov's inequality.

Next, by the triangle inequality,

$$\begin{aligned} \|R_{n2}\| &\leq \left\| \left( \Gamma_n' \bar{D}_n P_n^L - \Gamma_n' D_n P_n^L \right) \left( P_n^{L'} \bar{D}_n P_n^L \right)^{-1} P_n^{L'} D_n \tilde{\mathcal{E}}_n / \sqrt{n} \right\| \\ &\quad + \left\| \Gamma_n' D_n P_n^L \left[ \left( P_n^{L'} \bar{D}_n P_n^L \right)^{-1} - \left( P_n^{L'} D_n P_n^L \right)^{-1} \right] P_n^{L'} D_n \tilde{\mathcal{E}}_n / \sqrt{n} \right\| \\ &= \|R_{n21}\| + \|R_{n22}\|, \text{ say.} \end{aligned}$$

Noting that  $\|\Gamma'_n D_n P_n^L / n - \Gamma'_n \bar{D}_n P_n^L / n\| = o_P(1)$  by a similar argument in (1.4),

$$E \left[ \|R_{n21}\|^2 | D_n \right] \leq c \cdot \left\| \Gamma'_n D_n P_n^L / n - \Gamma'_n \bar{D}_n P_n^L / n \right\|^2 = o_P(1)$$

for sufficiently large  $n$ . In addition, because we have already shown that  $\left\| (P_n^{L'} D_n P_n^L)^{-1} - (P_n^{L'} \bar{D}_n P_n^L)^{-1} \right\| = o_P(1)$  in (1.3), similarly

$$E \left[ \|R_{n22}\|^2 | D_n \right] \leq c \cdot \left\| (P_n^{L'} \bar{D}_n P_n^L / n)^{-1} - (P_n^{L'} D_n P_n^L / n)^{-1} \right\|^2 = o_P(1)$$

for sufficiently large  $n$ . Finally, by Markov's inequality,  $\|R_{n2}\| = o_P(1)$ , which yields the desired result. ■

**Proof of Lemma A.5.** By the second-order Taylor expansion, as  $n \rightarrow \infty$ ,

$$\begin{aligned} \Gamma'_n \left[ I_n - \hat{P}_n \right] \left( D_n \Pi_0(\hat{V}_n) - D_n \Pi_0(V_n) \right) / \sqrt{n} &= \Gamma'_n \left[ I_n - \hat{P}_n \right] D_n \dot{\Pi}_0(V_n) W_n [\hat{\gamma}_n - \gamma_0] / \sqrt{n} \\ &\quad + \frac{1}{2} \Gamma'_n \left[ I_n - \hat{P}_n \right] D_n \ddot{\Pi}_0(\bar{V}_n) \{W_n [\hat{\gamma}_n - \gamma_0]\}^2 / \sqrt{n} \\ &= \left[ \Gamma'_n \left[ I_n - \hat{P}_n \right] D_n \dot{\Pi}_0(V_n) W_n / n \right] \psi_n + o_P(1), \end{aligned}$$

where  $\ddot{\Pi}_0(\bar{V}_n) = \text{diag} \{ \partial_{\bar{v}_1}^2 \pi_0(\bar{v}_1), \dots, \partial_{\bar{v}_n}^2 \pi_0(\bar{v}_n) \}$  with  $\bar{v}_i \in [\hat{v}_i, v_i]$  for  $i = 1, \dots, n$ , and the second equality follows from Assumption 2.2. Then, using similar arguments to the proof of Lemma A.4, we obtain the desired result. ■

**Proof of Lemma A.6.** First, observe that

$$\begin{aligned} \hat{B}_{nL} &= \left[ \hat{P}_n^{L'} D_n \hat{P}_n^L \right]^{-1} \hat{P}_n^{L'} \left( D_n Y_n - D_n S_n(\hat{\lambda}_n) Z_n \hat{\beta}_n \right) \\ &= B_{0L} + \hat{\mathcal{A}}'_n \Gamma_n(\hat{\lambda}_n) (\theta_0 - \hat{\theta}_n) + \hat{\mathcal{A}}'_n \left( \Pi_0(V_n) - \hat{P}_n^L B_{0L} \right) + \hat{\mathcal{A}}'_n \tilde{\epsilon}_n \\ &= B_{0L} + M_{n1} + M_{n2} + M_{n3}, \text{ say.} \end{aligned}$$

By the  $\sqrt{n}$ -consistency of  $\hat{\theta}_n$ ,

$$\begin{aligned} \|M_{n1}\|^2 &\leq (\theta_0 - \hat{\theta}_n)' \Gamma_n(\hat{\lambda}_n)' D_n \hat{P}_n^L \left[ \hat{P}_n^{L'} D_n \hat{P}_n^L \right]^{-2} \hat{P}_n^{L'} D_n \Gamma_n(\hat{\lambda}_n) (\theta_0 - \hat{\theta}_n) \\ &= [\underline{c}_d \underline{c}_P - o_P(1)]^{-1} (\theta_0 - \hat{\theta}_n)' \left( \Gamma_n(\hat{\lambda}_n)' \Gamma_n(\hat{\lambda}_n) / n \right) (\theta_0 - \hat{\theta}_n) = O_P(1/n) \end{aligned}$$

as  $n \rightarrow \infty$ . Thus,  $\|M_{n1}\| = O_P(1/\sqrt{n})$ . For  $M_{n2}$ , by the mean value expansion and the same argument as in the proof of Lemma A.3, we obtain

$$\begin{aligned} \|M_{n2}\| &\leq \left\| \hat{\mathcal{A}}'_n \dot{\Pi}_0(\bar{V}_n) W_n [\hat{\gamma}_n - \gamma_0] \right\| + \left\| \hat{\mathcal{A}}'_n \left( \Pi_0(\hat{V}_n) - \hat{P}_n^L B_{0L} \right) \right\| \\ &= O_P(1/\sqrt{n}) + O(L^{-\rho}). \end{aligned}$$

In addition, by Markov's inequality, we can readily show that  $\|M_{n3}\| = O_P(\sqrt{L}/\sqrt{n})$ . Then, the result follows from the triangle inequality. ■

## 2 Sketch of the Proof of Theorem 4.3

In Theorem 4.3 of this paper, we showed that the NLS estimator  $\hat{\theta}_{n,-1}$  for the model with group-specific effects has an asymptotic normality result similar to the one in Theorem 4.1. In order to establish this result, we modify Assumption 5 and 7, as follows.

**Assumption 5'**

Assumption 5 holds and, in addition,  $L^2/n \rightarrow 0$  as  $n \rightarrow \infty$ .

### Assumption 6'

1.  $0 < \underline{c}_R < \liminf_{n \rightarrow \infty} \tau_{\min}(\bar{R}_n)$  and 2. Assumption 6.2 holds.

### Assumption 7'

1.  $\Psi_1^\dagger \equiv \lim_{n \rightarrow \infty} \Psi_{n1}^\dagger$  and  $\Psi_2^\dagger \equiv \lim_{n \rightarrow \infty} \Psi_{n2}^\dagger$  exist and are positive definite and 2.  $F(\lambda) \equiv \lim_{n \rightarrow \infty} F_n(\lambda)$  exists and is positive definite uniformly in  $\lambda \in \mathcal{L}$ , where

$$\begin{aligned} F_n(\lambda) &\equiv \Gamma_{n,-1}^\perp(\lambda)' \bar{R}_n \Gamma_{n,-1}^\perp(\lambda) / n \\ \Gamma_{n,-1}(\lambda) &\equiv S_n(\lambda) [G_n S_n(\lambda_0) Z_{n,-1} \beta_{0,-1}, Z_{n,-1}] \\ \Gamma_{n,-1}^\perp(\lambda) &\equiv \Gamma_{n,-1}(\lambda) - P_n^L \left( P_n^{L'} \bar{R}_n P_n^L \right)^{-1} P_n^{L'} \bar{R}_n \Gamma_{n,-1}(\lambda). \end{aligned}$$

Note that Assumption 5' is automatically satisfied by Assumption 5.2 for, for example, splines such that  $\zeta_0(L) = O(L^{1/2})$ . Then, replacing  $D_n$  and  $\bar{D}_n$  with  $R_n$  and  $\bar{R}_n$ , respectively, we can obtain the desired result following the same line as Theorem 4.1. Most parts of the proof are similar to those given in the paper and above and can be omitted, so we only point out the differences.

First, we show the result which corresponds to Lemma A.1 (ii); namely,

$$\left\| P_n^{L'} R_n P_n^L / n - P_n^{L'} \bar{R}_n P_n^L / n \right\| = o_P(1). \quad (2.1)$$

Observe that, by definition, we can write

$$\begin{aligned} P_n^{L'} R_n P_n^L / n &= \frac{1}{n} \sum_{i=1}^n \sum_{j \in \mathcal{N}_{r(i)}} p^L(v_i) \rho_{n,ij} p^L(v_j)' \\ &= \frac{1}{n} \sum_{i=1}^n p^L(v_i) p^L(v_i)' d_i - \frac{1}{n} \sum_{i=1}^n \sum_{j \in \mathcal{N}_{r(i)}} p^L(v_i) p^L(v_j)' e_{i,j}, \end{aligned}$$

where  $\rho_{n,ij}$  is the  $(i, j)$ th element of  $R_n$ , and  $e_{i,j} \equiv (\sum_{j \in \mathcal{N}_{r(i)}} d_j)^{-1} d_i d_j$ . Hence, by the triangle inequality,

$$\begin{aligned} \left\| P_n^{L'} R_n P_n^L / n - P_n^{L'} \bar{R}_n P_n^L / n \right\| &\leq \left\| \frac{1}{n} \sum_{i=1}^n p^L(v_i) p^L(v_i)' (d_i - \mathbb{E}[d_i]) \right\| \\ &\quad + \left\| \frac{1}{n} \sum_{i=1}^n \sum_{j \in \mathcal{N}_{r(i)}} p^L(v_i) p^L(v_j)' (e_{i,j} - \mathbb{E}[e_{i,j}]) \right\|. \end{aligned}$$

As we have shown above, the first term on the right-hand side is of order  $o_P(1)$ . For the second term, recalling that the size of each group is fixed at a constant number (i.e., there exists a constant  $c_r > 0$  such that  $\max_{1 \leq i \leq n} n_{r(i)} < c_r$  uniformly in  $n$ ),

$$\begin{aligned} &\mathbb{E} \left\| \frac{1}{n} \sum_{i=1}^n \sum_{j \in \mathcal{N}_{r(i)}} p^L(v_i) p^L(v_j)' (e_{i,j} - \mathbb{E}[e_{i,j}]) \right\|^2 \\ &= n^{-2} \sum_{k=1}^L \sum_{\ell=1}^L \mathbb{E} \left( \sum_{i=1}^n \sum_{j \in \mathcal{N}_{r(i)}} p_k(v_i) p_\ell(v_j) (e_{i,j} - \mathbb{E}[e_{i,j}]) \right)^2 \\ &= n^{-2} \sum_{k=1}^L \sum_{\ell=1}^L \sum_{i=1}^n \sum_{h=1}^n \sum_{j \in \mathcal{N}_{r(i)}} \sum_{j' \in \mathcal{N}_{r(h)}} p_k(v_i) p_\ell(v_j) p_k(v_h) p_\ell(v_{j'}) \mathbb{E}[(e_{i,j} - \mathbb{E}[e_{i,j}])(e_{h,j'} - \mathbb{E}[e_{h,j'}])] \\ &= n^{-2} \sum_{k=1}^L \sum_{\ell=1}^L \sum_{i=1}^n \sum_{h \in \mathcal{N}_{r(i)}} \sum_{j \in \mathcal{N}_{r(i)}} \sum_{j' \in \mathcal{N}_{r(h)}} p_k(v_i) p_\ell(v_j) p_k(v_h) p_\ell(v_{j'}) \mathbb{E}[(e_{i,j} - \mathbb{E}[e_{i,j}])(e_{h,j'} - \mathbb{E}[e_{h,j'}])] \\ &\leq c n^{-2} \sum_{k=1}^L \sum_{\ell=1}^L \sum_{i=1}^n \sum_{h \in \mathcal{N}_{r(i)}} \sum_{j \in \mathcal{N}_{r(i)}} \sum_{j' \in \mathcal{N}_{r(h)}} p_k(v_i) p_\ell(v_j) p_k(v_h) p_\ell(v_{j'}). \end{aligned} \quad (2.2)$$

Here, note that all  $(h, j, j')$  belong to the same group as  $i$ . Let

$$\begin{aligned}
A_{n1} &\equiv n^{-2} \sum_{k=1}^L \sum_{\ell=1}^L \sum_{i=1}^n p_k^2(v_i) p_\ell^2(v_i) \\
A_{n2} &\equiv n^{-2} \sum_{k=1}^L \sum_{\ell=1}^L \sum_{i=1}^n \sum_{j' \in \mathcal{N}_{r(i)} \setminus \{i\}} p_k^2(v_i) p_\ell(v_i) p_\ell(v_{j'}) \\
A_{n3} &\equiv n^{-2} \sum_{k=1}^L \sum_{\ell=1}^L \sum_{i=1}^n \sum_{j \in \mathcal{N}_{r(i)} \setminus \{i\}} \sum_{j' \in \mathcal{N}_{r(i)} \setminus \{i\}} p_k^2(v_i) p_\ell(v_j) p_\ell(v_{j'}) \\
A_{n4} &\equiv n^{-2} \sum_{k=1}^L \sum_{\ell=1}^L \sum_{i=1}^n \sum_{h \in \mathcal{N}_{r(i)} \setminus \{i\}} \sum_{j \in \mathcal{N}_{r(i)} \setminus \{i\}} \sum_{j' \in \mathcal{N}_{r(i)} \setminus \{i\}} p_k(v_i) p_\ell(v_j) p_k(v_h) p_\ell(v_{j'}).
\end{aligned}$$

As already shown in the proof of Lemma A.1 (ii), we have  $A_{n1} = O(\zeta_0^2(L)L/n) = o(1)$ . Similarly, for  $A_{n2}$ ,

$$\begin{aligned}
A_{n2} &\leq n^{-2} \sum_{k=1}^L \sum_{\ell=1}^L \sum_{i=1}^n p_k^2(v_i) \cdot |p_\ell(v_i)| \sum_{j' \in \mathcal{N}_{r(i)} \setminus \{i\}} |p_\ell(v_{j'})| \\
&\leq O(c_r) n^{-2} \sum_{k=1}^L \sum_{\ell=1}^L \sum_{i=1}^n p_k^2(v_i) \cdot |p_\ell(v_i)| \\
&= O(\zeta_0^2(L)L/n) = o(1).
\end{aligned}$$

Further, we have  $A_{n3} = O(\zeta_0^2(L)L/n) = o(1)$  and  $A_{n4} = O(L^2/n) = o(1)$ , implying that the left-hand side of (2.2) is  $o(1)$ . Thus, by Markov's inequality, we obtain (2.1).

Next, as in Lemma A.2, we need to confirm that  $\mathcal{E}'_n R_n \mathcal{E}_n / n - \mathbb{E}[\mathcal{E}'_n R_n \mathcal{E}_n / n] = o(1)$ . This can be proved by using an analogous argument to Lemmas A.2 and A.3 of Lin and Lee (2010).

Finally, in the proof of asymptotic normality, we show, with a slight abuse of notation,

$$\sum_{j=1}^n \mathbb{E}[\xi_{1j}^4] = o(1), \quad \text{and} \quad \sum_{j=1}^n \mathbb{E}[\xi_{2j}^4] = o(1)$$

so that

$$\sum_{j=1}^n (\xi_{1j} + \xi_{2j}) = n^{-1/2} \mathbf{c}' \Psi_{n1}^{+1/2} \Gamma_{n,-1}^{\perp'} R_n \tilde{\mathcal{E}}_n \xrightarrow{d} N(0, 1),$$

where

$$\begin{aligned}
\xi_{1j} &\equiv n^{-1/2} \mathbf{c}' \Psi_{n1}^{+1/2} \sum_{i=1}^n \zeta_{i,-1} \rho_{n,ij} \tilde{\varepsilon}_j, \\
\xi_{2j} &\equiv -n^{-1/2} \mathbf{c}' \Psi_{n1}^{+1/2} \Gamma_n' \bar{D}_n P_n^L \left( P_n^{L'} \bar{D}_n P_n^L \right)^{-1} \sum_{i=1}^n p^L(v_i) \rho_{n,ij} \tilde{\varepsilon}_j.
\end{aligned}$$

Note that, since  $\zeta_{i,-1}$  is uniformly bounded and the column sums of  $R_n$  is uniformly bounded in absolute value (as long as each group has at least one respondent with  $d = 1$ ), we have  $\sum_{i=1}^n |\zeta_{i,-1} \rho_{n,ij}| < \infty$  uniformly in  $n$ . Hence,

$$\begin{aligned}
\sum_{j=1}^n \mathbb{E}[\xi_{1j}^4] &= n^{-2} \sum_{j=1}^n \mathbb{E} \mathbb{E} \left[ \left( \mathbf{c}' \Psi_{n1}^{+1/2} \sum_{i=1}^n \zeta_{i,-1} \rho_{n,ij} \right)^4 \tilde{\varepsilon}_j^4 \middle| D_n \right] \\
&\leq cn^{-2} \sum_{j=1}^n \mathbb{E} \left\{ \mathbf{c}' \Psi_{n1}^{+1/2} \Psi_{n1}^{+1/2} \mathbf{c} \cdot \mathbb{E}[\tilde{\varepsilon}_j^4 | d_j] \right\} = O(n^{-1}) = o(1).
\end{aligned}$$

Similarly, we can show  $\sum_{j=1}^n \mathbb{E}[\xi_{2j}^4] = o(1)$ .

### 3 Supplementary Tables

Below, we provide the descriptive statistics for the dataset used and supplementary empirical results in the above paper. Table 1 presents the descriptive statistics for our data, Table 2 shows the estimation results for the first-step estimation by the standard probit and Klein and Spady's (1993) SML, and Table 3 reports the results of the estimation of the GPA equation by the IMR and SSS models for the case when the two health status variables, Health and Absence, are excluded from the regressors.

Table 1: Descriptive statistics

|                                  | Mean    | Median | Std. Dev. | Min. | Max.   |
|----------------------------------|---------|--------|-----------|------|--------|
| $d$                              | 0.8695  | 1      | 0.3369    | 0    | 1      |
| GPA                              | 2.8438  | 3      | 0.7780    | 1    | 4      |
| Age                              | 14.8631 | 15     | 0.8365    | 11   | 19     |
| Male                             | 0.4712  | 0      | 0.4992    | 0    | 1      |
| White                            | 0.7115  | 1      | 0.4531    | 0    | 1      |
| Hispanic                         | 0.5492  | 0      | 1.8769    | 0    | 8      |
| Black                            | 0.1781  | 0      | 0.3826    | 0    | 1      |
| Asian                            | 0.0516  | 0      | 0.2213    | 0    | 1      |
| Live with both parents           | 0.7363  | 1      | 0.4406    | 0    | 1      |
| Mother's education ( $< 9$ )     | 0.1033  | 0      | 0.3043    | 0    | 1      |
| Mother's education ( $\geq 16$ ) | 0.2576  | 0      | 0.4373    | 0    | 1      |
| Mother's job (professional)      | 0.2995  | 0      | 0.4581    | 0    | 1      |
| Mother's job (unemployed)        | 0.0482  | 0      | 0.2142    | 0    | 1      |
| Father's education ( $< 9$ )     | 0.0922  | 0      | 0.2894    | 0    | 1      |
| Father's education ( $\geq 16$ ) | 0.2358  | 0      | 0.4245    | 0    | 1      |
| Father's job (professional)      | 0.2436  | 0      | 0.4293    | 0    | 1      |
| Father's job (unemployed)        | 0.0415  | 0      | 0.1995    | 0    | 1      |
| Academic club                    | 0.2273  | 0      | 0.4191    | 0    | 1      |
| Sports club                      | 0.6434  | 1      | 0.4790    | 0    | 1      |
| No club                          | 0.1427  | 0      | 0.3498    | 0    | 1      |
| Delinquency                      | 1.8459  | 1.3744 | 1.6098    | 0    | 9.5090 |
| Health                           | 2.1287  | 2      | 0.9357    | 1    | 5      |
| Absence                          | 0.4943  | 0      | 0.6355    | 0    | 4      |

\*: The descriptive statistics for GPA are calculated over those with  $d = 1$ .

Sample size: 6721 (3302: 9th graders, 3419: 10th graders)



Table 2: Estimation results for the selection equation

|                                  | Probit      |         | Klein and Spady* |         |
|----------------------------------|-------------|---------|------------------|---------|
|                                  | Coefficient | t-value | Coefficient      | t-value |
| Intercept                        | 3.2836      | 6.1690  | -                | -       |
| <i>Own Effects</i>               |             |         |                  |         |
| Neg. Age                         | 0.1273      | 4.0026  | 1.0000           | -       |
| Male                             | -0.0043     | -0.0881 | -0.0018          | -0.1894 |
| White                            | 0.1801      | 2.4712  | 0.0466           | 3.0430  |
| Hispanic                         | -0.0192     | -1.8523 | -0.0014          | -0.6202 |
| Black                            | 0.0564      | 0.6237  | 0.0141           | 0.7587  |
| Asian                            | 0.0423      | 0.3689  | 0.0114           | 0.5094  |
| Live with both parents           | 0.1475      | 2.8179  | 0.0220           | 2.0100  |
| Mother's education ( $< 9$ )     | 0.0602      | 0.8648  | 0.0090           | 0.6064  |
| Mother's education ( $\geq 16$ ) | 0.1391      | 2.1769  | 0.0172           | 1.3755  |
| Mother's job (professional)      | 0.0879      | 1.6439  | 0.0177           | 1.6537  |
| Mother's job (unemployed)        | -0.1184     | -1.2835 | -0.0172          | -0.9024 |
| Father's education ( $< 9$ )     | 0.0363      | 0.4624  | 0.0082           | 0.5017  |
| Father's education ( $\geq 16$ ) | -0.0116     | -0.1712 | -0.0021          | -0.1584 |
| Father's job (professional)      | 0.0618      | 0.9622  | 0.0051           | 0.4088  |
| Father's job (unemployed)        | -0.1054     | -0.9923 | -0.0150          | -0.6988 |
| Academic club                    | 0.2544      | 4.2995  | 0.0321           | 2.8296  |
| Sports club                      | -0.0186     | -0.3325 | 0.0012           | 0.1047  |
| No club                          | -0.1076     | -1.5528 | -0.0220          | -1.5102 |
| Delinquency                      | 0.0001      | 0.0096  | -0.0004          | -0.1307 |
| Health                           | -0.0410     | -1.7165 | -0.0080          | -1.7059 |
| Absence                          | -0.0581     | -1.7116 | -0.0150          | -2.1526 |
| 10th grade dummy                 | -0.1502     | -0.5061 | 0.0032           | 0.0858  |
| <i>Contextual Effects</i>        |             |         |                  |         |
| Age                              | -0.0036     | -0.3181 | -0.0031          | -1.3163 |
| Male                             | 0.0233      | 0.2906  | 0.0043           | 0.2672  |
| White                            | 0.0966      | 0.7830  | 0.0246           | 0.9396  |
| Hispanic                         | -0.0138     | -0.7126 | -0.0023          | -0.5717 |
| Black                            | 0.0381      | 0.2679  | 0.0201           | 0.6917  |
| Asian                            | -0.2920     | -1.6273 | -0.0744          | -2.1104 |
| Live with both parents           | 0.1764      | 1.8620  | 0.0446           | 2.2741  |
| Mother's education ( $< 9$ )     | -0.1139     | -0.9381 | -0.0209          | -0.8257 |
| Mother's education ( $\geq 16$ ) | 0.1329      | 1.2138  | 0.0240           | 1.1372  |
| Mother's job (professional)      | 0.1906      | 1.9695  | 0.0292           | 1.5117  |
| Mother's job (unemployed)        | 0.1362      | 0.7874  | 0.0243           | 0.7017  |
| Father's education ( $< 9$ )     | -0.0439     | -0.3303 | -0.0058          | -0.2120 |
| Father's education ( $\geq 16$ ) | 0.0776      | 0.6348  | 0.0158           | 0.6781  |
| Father's job (professional)      | 0.0245      | 0.2182  | -0.0018          | -0.0822 |
| Father's job (unemployed)        | -0.0132     | -0.0717 | -0.0106          | -0.2879 |
| Academic club                    | 0.0094      | 0.0987  | -0.0091          | -0.5070 |
| Sports club                      | 0.1566      | 1.6978  | 0.0404           | 2.1920  |
| No club                          | 0.0130      | 0.1031  | 0.0021           | 0.0787  |
| Delinquency                      | -0.0456     | -1.8786 | -0.0084          | -1.6872 |
| Sample size                      | 6721        |         | 6721             |         |

Note: The results for the school-specific dummies are omitted to save space.

\*: The coefficient of negative age (Neg. Age) is set to one for identification.

Table 3: Estimation results when the health variables are excluded from the GPA equation

| Group-specific effects           | No         |          |            |          | Yes       |         |           |          |
|----------------------------------|------------|----------|------------|----------|-----------|---------|-----------|----------|
|                                  | IMR model* |          | SSS model* |          | IMR model |         | SSS model |          |
|                                  | Coef.      | t-value  | Coef.      | t-value  | Coef.     | t-value | Coef.     | t-value  |
| Intercept                        | 4.2580     | 15.2265  | 3.3020     | 3.0151   |           |         |           |          |
| <i>Endogeneous Effect</i>        | 0.3450     | 5.9117   | 0.3940     | 4.7499   | 0.5660    | 4.9870  | 0.6274    | 6.9272   |
| <i>Own Effects</i>               |            |          |            |          |           |         |           |          |
| Age                              | -0.1154    | -5.8334  | -0.4061    | -1.8679  | -0.0581   | -2.5911 | -0.0816   | -4.3190  |
| Male                             | -0.1279    | -5.1513  | -0.1286    | -6.1635  | -0.1534   | -6.0798 | -0.1545   | -6.9703  |
| White                            | 0.0716     | 1.6221   | 0.0765     | 2.0622   | 0.0961    | 2.3601  | 0.0979    | 2.4013   |
| Hispanic                         | -0.0222    | -3.4842  | -0.0214    | -4.0982  | -0.0137   | -2.0847 | -0.0165   | -2.9593  |
| Black                            | -0.0986    | -1.8107  | -0.1041    | -2.3222  | 0.0078    | 0.1129  | 0.0126    | 0.1979   |
| Asian                            | 0.3222     | 5.0255   | 0.2996     | 5.8169   | 0.2071    | 2.8758  | 0.2130    | 3.3561   |
| Live with both parents           | 0.0774     | 2.5756   | 0.0777     | 3.1456   | 0.0688    | 2.1819  | 0.0909    | 3.4854   |
| Mother's education ( $< 9$ )     | -0.0781    | -1.8716  | -0.0795    | -2.2663  | -0.0988   | -2.2451 | -0.0936   | -2.4297  |
| Mother's education ( $\geq 16$ ) | 0.1254     | 4.3520   | 0.1284     | 5.2429   | 0.0822    | 2.7650  | 0.0977    | 3.9159   |
| Mother's job (professional)      | 0.0371     | 1.4768   | 0.0406     | 1.8763   | 0.0131    | 0.5109  | 0.0210    | 0.9543   |
| Mother's job (unemployed)        | -0.0453    | -0.8366  | -0.0519    | -1.1782  | -0.0265   | -0.4744 | -0.0454   | -0.9661  |
| Father's education ( $< 9$ )     | -0.0099    | -0.2324  | -0.0059    | -0.1635  | -0.0309   | -0.7057 | -0.0207   | -0.5417  |
| Father's education ( $\geq 16$ ) | 0.0883     | 3.0054   | 0.0885     | 3.5554   | 0.0518    | 1.7546  | 0.0482    | 1.9199   |
| Father's job (professional)      | 0.1133     | 4.0584   | 0.1127     | 4.7156   | 0.0615    | 2.1683  | 0.0689    | 2.8361   |
| Father's job (unemployed)        | -0.0365    | -0.6539  | -0.0397    | -0.8481  | -0.0401   | -0.6991 | -0.0580   | -1.2001  |
| Academic club                    | 0.1933     | 7.0493   | 0.1975     | 8.4003   | 0.1194    | 4.0222  | 0.1435    | 6.1584   |
| Sports club                      | 0.0751     | 2.6718   | 0.0766     | 3.1830   | 0.0439    | 1.4984  | 0.0433    | 1.6928   |
| No club                          | -0.0988    | -2.4578  | -0.1000    | -2.9652  | -0.0252   | -0.5971 | -0.0408   | -1.1292  |
| Delinquency                      | -0.0888    | -11.5775 | -0.0912    | -14.0129 | -0.0745   | -9.6298 | -0.0710   | -10.4665 |
| 10th grade dummy                 | 0.1017     | 2.6680   | 0.1213     | 3.2293   |           |         |           |          |
| <i>Contextual Effects</i>        |            |          |            |          |           |         |           |          |
| Age                              | -0.0554    | -5.0827  | -0.0123    | -0.8798  | 0.0020    | 0.0707  | 0.0199    | 0.7268   |
| Male                             | 0.1737     | 4.5161   | 0.1848     | 5.6997   | 0.1772    | 4.9572  | 0.1812    | 5.6110   |
| White                            | -0.0040    | -0.0606  | -0.0157    | -0.2947  | 0.0390    | 0.5904  | 0.0251    | 0.4232   |
| Hispanic                         | 0.0002     | 0.0202   | 0.0022     | 0.2574   | -0.0085   | -0.8453 | -0.0065   | -0.7173  |
| Black                            | 0.0515     | 0.6686   | 0.0581     | 0.9035   | 0.0211    | 0.2461  | 0.0263    | 0.3332   |
| Asian                            | -0.1140    | -1.1578  | -0.1420    | -1.7748  | 0.0797    | 0.7383  | 0.0358    | 0.3797   |
| Live with both parents           | -0.0685    | -1.4216  | -0.0683    | -1.6664  | -0.0238   | -0.5104 | -0.0193   | -0.4534  |
| Mother's education ( $< 9$ )     | 0.0741     | 1.1047   | 0.0826     | 1.4731   | 0.0169    | 0.2467  | 0.0116    | 0.1890   |
| Mother's education ( $\geq 16$ ) | -0.0409    | -0.8964  | -0.0492    | -1.2241  | -0.0193   | -0.4025 | -0.0204   | -0.4751  |
| Mother's job (professional)      | 0.0825     | 2.0040   | 0.0831     | 2.3812   | 0.0478    | 1.1371  | 0.0583    | 1.5511   |
| Mother's job (unemployed)        | 0.1288     | 1.4864   | 0.1284     | 1.7649   | -0.0232   | -0.2602 | 0.0110    | 0.1381   |
| Father's education ( $< 9$ )     | -0.0276    | -0.4173  | -0.0492    | -0.8812  | -0.0838   | -1.2458 | -0.0818   | -1.3581  |
| Father's education ( $\geq 16$ ) | 0.1045     | 2.1227   | 0.0991     | 2.2678   | 0.0535    | 1.4398  | 0.0580    | 1.8678   |
| Father's job (professional)      | -0.0383    | -0.8313  | -0.0459    | -1.1338  | 0.0163    | 0.3369  | 0.0026    | 0.0605   |
| Father's job (unemployed)        | -0.0298    | -0.3434  | -0.0250    | -0.3386  | -0.0676   | -0.7437 | -0.0525   | -0.6534  |
| Academic club                    | 0.0539     | 1.2993   | 0.0356     | 0.9126   | 0.0899    | 1.7570  | 0.0591    | 1.2865   |
| Sports club                      | -0.0123    | -0.2915  | -0.0099    | -0.2669  | -0.0159   | -0.3921 | -0.0037   | -0.1009  |
| No club                          | -0.0189    | -0.2927  | 0.0021     | 0.0384   | -0.0346   | -0.5602 | -0.0160   | -0.2892  |
| Delinquency                      | -0.0214    | -1.5513  | -0.0136    | -0.8763  | -0.0082   | -0.4405 | -0.0092   | -0.5710  |
| Sample size                      | 6721       |          | 6721       |          | 5689      |         | 5689      |          |

\* School specific-dummy variables are included, but are not displayed to save space.

## 4 Additional Monte Carlo experiment

In this section, we numerically examine the estimation accuracy of the intercept term in a model with isolated individuals. As discussed in Section 3.1, the (regular) identification of the intercept  $\alpha_0$  is not possible if  $\lambda_0 = 0$ ; and even when  $\lambda_0$  is not zero but close to zero, the identification is weak. The DGP considered in this analysis is as follows:

$$d_i \cdot y_i = d_i \cdot \left( \frac{\lambda_0}{n(i)} \sum_{j \in \mathcal{C}_i} E[y_j] + x_i \beta_{01} + \frac{1}{n(i)} \sum_{j \in \mathcal{C}_i} x_j \beta_{02} + \alpha_0 + \varepsilon_i \right)$$

$$d_i = 1(\gamma_{01} + x_i \gamma_{02} + w_i \gamma_{03} + \eta_i \geq 0),$$

for  $i = 1, \dots, n$ , where,  $x_i$ 's  $\sim$  i.i.d.  $N(0, 1)$ ,  $w_i$ 's  $\sim$  i.i.d.  $N(0, 1)$ ,  $\eta_i$ 's  $\sim$  i.i.d.  $N(0, 1)$ , and  $\varepsilon_i = \sqrt{0.3} \cdot \eta_i + \sqrt{1 - 0.3} \cdot \varepsilon_{1i}$  with  $\varepsilon_{1i}$ 's  $\sim$  i.i.d.  $N(0, 1)$ . The true values for the parameters are as follows:  $\beta_{01} = 1$ ,  $\beta_{02} = 1$ ,  $\gamma_{01} = 0.5$ ,  $\gamma_{02} = 0.5$ ,  $\gamma_{03} = 0.5$ , and  $\alpha_0 = 1$ . For this DGP, we consider three sample sizes:  $n \in \{200, 400, 800\}$ . The size of each group  $n_r$  is set to either 20, 30, or 50 in a way such that  $n_1 = 20$ ,  $n_2 = 30$ ,  $n_3 = 50$ ,  $n_4 = 20$ , ... and so on. For each group  $r$ , the interaction matrix  $G_r$  is defined according to a rook-contiguity spatial weight matrix. In other words, we randomly allocate  $n_r$  units on the lattice of  $5 \times t$  such that  $5t = n_r$ , and set  $j \in \mathcal{C}_i$  if  $i$  and  $j$  are rook-contiguous on the lattice. Furthermore, we randomly select  $n_r/5$  individuals within each group and reset their  $\mathcal{C}_i$  to empty to identify  $\alpha_0$ . Then, we compute the average bias for estimating  $\alpha_0$  with different  $\lambda_0$  values ranging from 0.1 to 0.9, that is,  $\lambda_0 \in \{0.1, 0.2, \dots, 0.9\}$ . The first-step estimation of  $(\gamma_{01}, \gamma_{02}, \gamma_{03})$  is carried out simply using the standard probit estimator. The number of Monte Carlo repetitions is set to 500 for each case.

The results of this simulation analysis are summarized in Figure 1, where the x-axis represents the value of  $\lambda_0$  and the y-axis is the average bias. As predicted by the theory, when  $\lambda_0$  is close to zero,  $\alpha_0$  cannot be estimated correctly regardless of sample size. In addition, we observe that the identification power is heavily dependent on the sample size: the larger the sample size, the higher the power. This result may reflect the fact that, in our DGP, we can observe a larger number of isolated individuals as the sample size increases, and thus more variations in the value of  $(I_n - \lambda_0 G_n)^{-1}$ . For example, when  $\lambda_0 = 0.4$ , it is possible to almost precisely estimate the intercept if we have  $n = 800$ , while the estimates of the intercept for  $n = 200$  are still largely biased. When  $n = 200$ , it seems to require  $\lambda_0$  to be at least 0.6 for precise estimation; the case with  $n = 400$  is in between.

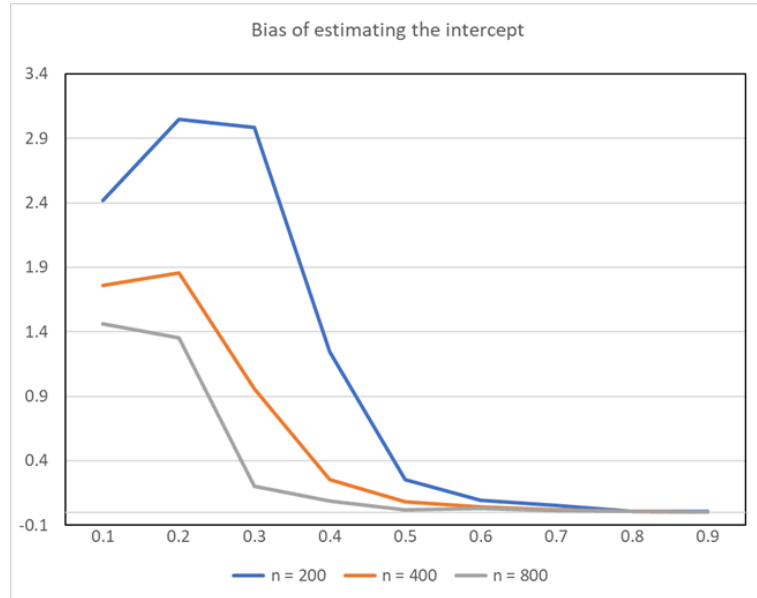

Figure 1: Bias of estimating the intercept

## References

- Klein, R. W., and Spady, R. H. (1993) An efficient semiparametric estimator for binary response models. *Econometrica*, 61, 387-421.
- Lee, L. F. (2004) Asymptotic distributions of quasi-maximum likelihood estimators for spatial autoregressive models. *Econometrica*, 72, 1899-1925.
- Lin, X., and Lee, L. F. (2010) GMM estimation of spatial autoregressive models with unknown heteroskedasticity. *Journal of Econometrics*, 157, 34-52.
- Su, L., and Jin, S. (2012) Sieve estimation of panel data models with cross section dependence. *Journal of Econometrics*, 169, 34-47.
