# Supplementary material
Source: publisher figshare collection journal article supplement (https://tandf.figshare.com/articles/dataset/_/5530285)
Supplement: Supplementary file 2 [file 2]

# Appendix

## A Proofs of Theorems 4.1 and 4.2

Throughout the proofs, we use the following notations:

$$\begin{aligned} \mathcal{P}_n &\equiv D_n P_n^L [P_n^{L'} D_n P_n^L]^{-1} P_n^{L'} D_n & U_n(\theta) &\equiv Y_n - S_n(\lambda) Z_n \beta & H_n(\theta) &\equiv S_n(\lambda_0) Z_n \beta_0 - S_n(\lambda) Z_n \beta \\ \mathcal{A}_n &\equiv D_n P_n^L [P_n^{L'} D_n P_n^L]^{-1} & \hat{\mathcal{A}}_n &\equiv D_n \hat{P}_n^L [\hat{P}_n^{L'} D_n \hat{P}_n^L]^{-1} \end{aligned}$$

The proofs of the technical lemmas are given in Section 1 in the online supplementary material.

### A.1 Proof of Theorem 4.1

**Lemma A.1** (i)  $\left\| \hat{P}_n^{L'} D_n / \sqrt{n} - P_n^{L'} D_n / \sqrt{n} \right\| = O_P(\zeta_1(L) / \sqrt{n}) = o_P(1)$ ; (ii)  $\left\| P_n^{L'} D_n P_n^L / n - P_n^{L'} \bar{D}_n P_n^L / n \right\| = O_P(\zeta_0(L) L^{1/2} / \sqrt{n}) = o_P(1)$ ; (iii) for sufficiently large  $n$ ,

$$\underline{c}_d \underline{c}_P - o_P(1) \leq \tau_{\min} \left( P_n^{L'} D_n P_n^L / n \right) \leq \tau_{\max} \left( P_n^{L'} D_n P_n^L / n \right) \leq \bar{c}_P + o_P(1);$$

(iv)  $\left\| \hat{P}_n^{L'} D_n \hat{P}_n^L / n - P_n^{L'} D_n P_n^L / n \right\| = O_P(\zeta_1(L) / \sqrt{n}) = o_P(1)$ ; (v) for sufficiently large  $n$ ,

$$\underline{c}_d \underline{c}_P - o_P(1) \leq \tau_{\min} \left( \hat{P}_n^{L'} D_n \hat{P}_n^L / n \right) \leq \tau_{\max} \left( \hat{P}_n^{L'} D_n \hat{P}_n^L / n \right) \leq \bar{c}_P + o_P(1);$$

(vi)  $\sup_{\theta \in \mathcal{L} \times \mathcal{B}} \left\| \left( P_n^{L'} D_n - \hat{P}_n^{L'} D_n \right) U_n(\theta) / n \right\| = o_P(1)$ ; (vii)  $\sup_{\theta \in \mathcal{L} \times \mathcal{B}} \|U_n(\theta)' \mathcal{A}_n\| = O_P(1)$ ; (viii)  $\sup_{\theta \in \mathcal{L} \times \mathcal{B}} \|U_n(\theta)' \hat{\mathcal{A}}_n\| = O_P(1)$ .

**Lemma A.2**  $Q_n(\theta)$  converges in probability to  $Q_n^*(\theta)$  as  $n \rightarrow \infty$  uniformly in  $\theta \in \mathcal{L} \times \mathcal{B}$ , where

$$Q_n^*(\theta) = \frac{1}{2n} E \left( U_n(\theta)' D_n U_n(\theta) \right) - \frac{1}{2n} E \left( U_n(\theta)' D_n P_n^L \right) \left( P_n^{L'} \bar{D}_n P_n^L \right)^{-1} E \left( P_n^{L'} D_n U_n(\theta) \right).$$

#### Proof of consistency

We prove consistency following Theorem 3.4 of White (1996). We have already shown the uniform convergence of  $Q_n(\theta)$  to  $Q_n^*(\theta)$  on  $\mathcal{L} \times \mathcal{B}$  in Lemma A.2. Then, it suffices to show the *identifiable uniqueness* condition (White, 1996, Definition 3.3): for all  $\epsilon > 0$ ,

$$\liminf_{n \rightarrow \infty} \min_{\theta \in \mathcal{L} \times \mathcal{B}: \|\theta - \theta_0\| \geq \epsilon} [Q_n^*(\theta) - Q_n^*(\theta_0)] > 0. \quad (\text{A.1})$$

Observe that

$$\begin{aligned} Q_n^*(\theta) - Q_n^*(\theta_0) &= \frac{1}{2n} E \left( H_n(\theta)' D_n H_n(\theta) \right) + \frac{1}{n} E \left( H_n(\theta)' D_n \mathcal{E}_n \right) \\ &\quad - \frac{1}{2n} E \left( H_n(\theta)' D_n P_n^L \right) \left( P_n^{L'} \bar{D}_n P_n^L \right)^{-1} E \left( P_n^{L'} D_n H_n(\theta) \right) \\ &\quad - \frac{1}{n} E \left( H_n(\theta)' D_n P_n^L \right) \left( P_n^{L'} \bar{D}_n P_n^L \right)^{-1} E \left( P_n^{L'} D_n \mathcal{E}_n \right). \end{aligned}$$

Furthermore, by the law of iterated expectations,

$$\begin{aligned}
\frac{1}{n} \mathbb{E} (H_n(\theta)' D_n \mathcal{E}_n) &= \frac{1}{n} \mathbb{E} (H_n(\theta)' D_n \Pi_0(V_n)) \\
&= \frac{1}{n} \mathbb{E} (H_n(\theta)' D_n P_n^L B_{0L}) + \frac{1}{n} \mathbb{E} (H_n(\theta)' D_n [\Pi_0(V_n) - P_n^L B_{0L}]) \\
&= \frac{1}{n} \mathbb{E} (H_n(\theta)' D_n P_n^L B_{0L}) + O(L^{-\rho}).
\end{aligned}$$

Similarly, we obtain

$$\frac{1}{n} \mathbb{E} (H_n(\theta)' D_n P_n^L) (P_n^{L'} \bar{D}_n P_n^L)^{-1} \mathbb{E} (P_n^{L'} D_n \mathcal{E}_n) = \frac{1}{n} \mathbb{E} (H_n(\theta)' D_n P_n^L B_{0L}) + O(L^{-\rho}).$$

Consequently,

$$\begin{aligned}
Q_n^*(\theta) - Q_n^*(\theta_0) &= \frac{1}{2} \left[ H_n(\theta)' \bar{D}_n H_n(\theta) / n - (H_n(\theta)' \bar{D}_n P_n^L / n) (P_n^{L'} \bar{D}_n P_n^L / n)^{-1} (P_n^{L'} \bar{D}_n H_n(\theta) / n) \right] + o(1) \\
&= \frac{1}{2} (\theta_0 - \theta)' \Lambda_n(\lambda) (\theta_0 - \theta) + o(1).
\end{aligned}$$

Then, since  $\Lambda_n(\lambda)$  is positive definite for any  $\lambda \in \mathcal{L}$  as  $n \rightarrow \infty$  by Assumption 7.2, this implies (A.1). ■

**Lemma A.3**  $\Gamma_n' [I_n - \hat{P}_n] D_n \Pi_0(\hat{V}_n) / \sqrt{n} = o(1)$ .

**Lemma A.4**  $\Gamma_n' [I_n - \hat{P}_n] D_n \tilde{\mathcal{E}}_n / \sqrt{n} = \Gamma_n^{\perp'} D_n \tilde{\mathcal{E}}_n / \sqrt{n} + o_P(1)$ .

**Lemma A.5**  $\Gamma_n' [I_n - \hat{P}_n] (D_n \Pi_0(V_n) - D_n \Pi_0(\hat{V}_n)) / \sqrt{n} = - [\Gamma_n^{\perp'} \bar{D}_n \dot{\Pi}_0(V_n) W_n / n] \psi_n + o_P(1)$ .

### Proof of normality

By the first-order condition and the mean value theorem,

$$\mathbf{0}_{(k_1+k_2+2)} = \sqrt{n} \partial_\theta Q_n(\theta_0) + \partial_{\theta\theta'} Q_n(\bar{\theta}_n) \sqrt{n} (\hat{\theta}_n - \theta_0)$$

with  $\bar{\theta}_n \in [\hat{\theta}_n, \theta_0]$ . By Lemmas A.3, A.4, and A.5, we obtain

$$\begin{aligned}
\sqrt{n} \partial_\theta Q_n(\theta_0) &= -\Gamma_n' D_n [I_n - \hat{P}_n] (D_n Y_n - D_n S_n(\lambda_0) Z_n \beta_0) / \sqrt{n} \\
&= - \left( \Gamma_n^{\perp'} D_n \tilde{\mathcal{E}}_n / \sqrt{n} - [\Gamma_n^{\perp'} \bar{D}_n \dot{\Pi}_0(V_n) W_n / n] \psi_n \right) + o_P(1).
\end{aligned}$$

Now, we show that  $\Gamma_n^{\perp'} D_n \tilde{\mathcal{E}}_n / \sqrt{n} \xrightarrow{d} N(\mathbf{0}_{(k_1+k_2+2)}, \Psi_1)$ . To demonstrate this, we show that

$$n^{-1/2} \mathbf{c}' \Psi_{n1}^{-1/2} \Gamma_n^{\perp'} D_n \tilde{\mathcal{E}}_n \equiv \Xi_n \xrightarrow{d} N(0, 1), \quad (\text{A.2})$$

where  $\mathbf{c}$  is an arbitrary  $(k_1 + k_2 + 2) \times 1$  vector satisfying  $\|\mathbf{c}\| = 1$ . Furthermore, we define  $\Xi_n \equiv \sum_{j=1}^n \xi_j = \sum_{j=1}^n (\tilde{\xi}_{1j} + \tilde{\xi}_{2j})$  with

$$\begin{aligned}
\tilde{\xi}_{1j} &\equiv n^{-1/2} \mathbf{c}' \Psi_{n1}^{-1/2} \zeta_j d_j \tilde{\varepsilon}_j, \\
\tilde{\xi}_{2j} &\equiv -n^{-1/2} \mathbf{c}' \Psi_{n1}^{-1/2} \Gamma_n' \bar{D}_n P_n^L (P_n^{L'} \bar{D}_n P_n^L)^{-1} p^L(v_j) d_j \tilde{\varepsilon}_j,
\end{aligned}$$

where  $\varsigma_j$  is the  $j$ th column of  $\Gamma'_n$ , and  $\tilde{\varepsilon}_j \equiv \varepsilon_j - \pi_0(v_j)$ . Then, by Assumptions 3.1 and 7.1 and the law of iterated expectations,

$$\begin{aligned} \sum_{j=1}^n \mathbb{E} \left[ \tilde{\varepsilon}_{1j}^4 \right] &= n^{-2} \sum_{j=1}^n \mathbb{E} \left\{ \left( \mathbf{c}' \Psi_{n1}^{-1/2} \varsigma_j \right)^4 d_j \mathbb{E} \left[ \tilde{\varepsilon}_j^4 | d_j \right] \right\} \\ &\leq cn^{-2} \sum_{j=1}^n \left\{ \mathbf{c}' \Psi_{n1}^{-1/2} \varsigma_j \varsigma_j' \Psi_{n1}^{-1/2} \mathbf{c} \mathbf{c}' \Psi_{n1}^{-1/2} \varsigma_j \varsigma_j' \Psi_{n1}^{-1/2} \mathbf{c} \right\} \\ &\leq cn^{-2} \sum_{j=1}^n \mathbf{c}' \Psi_{n1}^{-1} \Psi_{n1}^{-1} \mathbf{c} = O(n^{-1}) = o(1) \end{aligned}$$

as  $n \rightarrow \infty$ . Similarly

$$\begin{aligned} \sum_{j=1}^n \mathbb{E} \left[ \tilde{\varepsilon}_{2j}^4 \right] &\leq c\zeta_0^2(L)n^{-2} \left\{ \mathbf{c}' \Psi_{n1}^{-1/2} \Gamma'_n \bar{D}_n P_n^L \left( P_n^{L'} \bar{D}_n P_n^L \right)^{-1} P_n^{L'} \bar{D}_n P_n^L \left( P_n^{L'} \bar{D}_n P_n^L \right)^{-1} P_n^{L'} \bar{D}_n \Gamma_n \Psi_{n1}^{-1/2} \mathbf{c} \right\} \\ &\leq c\zeta_0^2(L)n^{-1} \mathbf{c}' \Psi_{n1}^{-1} \mathbf{c} = O\left(\zeta_0^2(L)/n\right) = o(1) \end{aligned}$$

holds as  $n \rightarrow \infty$  by Assumption 5.2. Then, we obtain

$$\begin{aligned} \sum_{j=1}^n \mathbb{E} \left[ \tilde{\varepsilon}_j^4 \right] &= \sum_{j=1}^n \mathbb{E} \left[ (\tilde{\varepsilon}_{1j} + \tilde{\varepsilon}_{2j})^4 \right] \\ &\leq 8 \left\{ \sum_{j=1}^n \mathbb{E} \left[ \tilde{\varepsilon}_{1j}^4 \right] + \sum_{j=1}^n \mathbb{E} \left[ \tilde{\varepsilon}_{2j}^4 \right] \right\} = o(1) \end{aligned}$$

by the  $c_r$ -inequality. Therefore, (A.2) is verified by Lyapunov's central limit theorem, and we obtain

$$n^{-1/2} \Psi_{n1}^{-1/2} \Gamma_n^{\perp'} D_n \tilde{\varepsilon}_n \xrightarrow{d} N\left(0, I_{(k_1+k_2+2)}\right)$$

by the Cramer–Wold device. Noting the consistency of  $\bar{\theta}_n$  for  $\theta_0$  and, thus, the convergence in probability of  $\partial_{\theta\theta'} Q_n(\bar{\theta}_n)$  to  $\Lambda$  as  $n \rightarrow \infty$  by the continuous mapping theorem, the proof is completed by applying Slutsky's theorem. ■

## A.2 Proof of Theorem 4.2

**Lemma A.6**  $\left\| B_{0L} - \hat{B}_{nL} \right\| = O_P\left(\sqrt{L}/\sqrt{n}\right)$ .

### Proof of Theorem 4.2

First, note that

$$\begin{aligned} \max_{1 \leq i \leq n} \left| \partial_v \pi_0(\hat{v}_i) - \partial_v p^L(\hat{v}_i)' \hat{B}_{nL} \right| &\leq \sup_{v \in [-c_v, c_v]} \left| \partial_v \pi_0(v) - \partial_v p^L(v)' B_{0L} \right| + \sup_{v \in [-c_v, c_v]} \left| \partial_v p^L(v)' \left( B_{0L} - \hat{B}_{nL} \right) \right| \\ &= O(L^{-(\rho-1)}) + O_P(\zeta_1(L) \sqrt{L}/\sqrt{n}) = o_P(1) \end{aligned}$$

as  $n \rightarrow \infty$  by Lemma A.6 and the assumptions made in the theorem. This leads to  $\|\hat{\Psi}_{n2} - \Psi_{n2}\| = o_P(1)$  in a straightforward way by the continuity of  $\partial_v \pi_0(\cdot)$ .

Next, by the same argument as in Newey (2009, A.12), we can obtain  $\|\hat{\Psi}_{n1} - \hat{\Gamma}_n^\perp' \Sigma_n^* \hat{\Gamma}_n^\perp / n\| = o_P(1)$ . Further,

$$\begin{aligned} \left\| \hat{\Gamma}_n^\perp' \Sigma_n^* \hat{\Gamma}_n^\perp / n - \Psi_{n1} \right\| &\leq \left\| \left( \hat{\Gamma}_n^\perp - \Gamma_n^\perp \right)' \Sigma_n^* \left( \hat{\Gamma}_n^\perp - \Gamma_n^\perp \right) / n \right\| + 2 \left\| \left( \hat{\Gamma}_n^\perp - \Gamma_n^\perp \right)' \Sigma_n^* \Gamma_n^\perp / n \right\| \\ &= \|J_{n1}\| + 2 \|J_{n2}\|, \text{ say.} \end{aligned}$$

For  $J_{n1}$ , we have  $\|J_{n1}\| \leq \bar{c}_{\varepsilon,2} \left\| \left( \hat{\Gamma}_n^\perp - \Gamma_n^\perp \right) / \sqrt{n} \right\|^2 = o_P(1)$ . For  $J_{n2}$ , by the matrix Cauchy–Schwarz inequality,

$$\begin{aligned} \|J_{n2}\| &\leq \left\| \Gamma_n^\perp' \Sigma_n^* \Gamma_n^\perp / n \right\|^{1/2} \|J_{n1}\|^{1/2} \\ &\leq c \bar{c}_{\varepsilon,2}^{1/2} \|J_{n1}\|^{1/2} = o_P(1). \end{aligned}$$

This implies that  $\|\hat{\Psi}_{n1} - \Psi_{n1}\| = o_P(1)$  by the triangle inequality. The rest of the proof is straightforward and is omitted. ■
